# Supplementary material for: Multi-omics reveals azacitidine partially restores the hematopoiesis-supportive functions in mesenchymal stromal cells from patients with chronic myelomonocytic leukemia
Source: Research Square preprint supplement (doi:10.21203/rs.3.rs-2475679/v1), 2023-01-27
Supplement: Supplementary file 1 [file 15f93ffb6a05e294615e4588.xlsx]

## Sheet: Sheet1
No.	Sex	Age, y	Diagnosis, (WHO 2016)	CPSS Risk	MNC Cytogenetics	MSC Cytogenetics	Mutations, VAF%
Pt#9	Female	70	CMML-1	Int-1	46, XX	-	TET2 (49.00), PPM1D (49.29), SF3B1 (43.84), KIT (29.05), KIT (11.2), KMT2D (49.53)
Pt#7	Male	62	CMML-1	Int-1	46, XY	-	DNMT3A (42.57), SMC3 (41.61), PTPN11 (34.61), NPM1 (38.08)
Pt#6	Male	60	CMML-1	Int-1	46, XY	-	DNMT3A (-), NPM1 (-)
Pt#5	Male	55	CMML-2	Int-2	46, XY	-	RUNX1 (33.47), ASXL1 (25.57), ETV6 (51.49), NRAS (34.00)
Pt#31	Male	33	CMML-1	Int-2	46, XY	-	KRAS (-), ASXL1 (-), RBBP6 (-), FRFR3 (-), CREBBP (-)
Pt#3	Male	66	CMML-2	High	46, XY	-	TET2 (-), DNMT3A (-), KRAS (-), NPM1 (-), CUX1 (-), PLCG1 (-)
Pt#29	Male	60	CMML-1	Int-2	46, XY	-	TET2 (44.50), RUNX1 (47.77), ASXL1 (31.73), CBL (85.15), CEBPA (38.21)
Pt#27	Male	52	CMML-2	Int-2	46, XY	-	SRSF2 (49.65), TET2 (39.90), DNMT3A (44.54), GATA2 (60.87), SF1 (55.46),
Pt#26	Female	23	CMML-2	Int-2	46, XX	-	NRAS (-), WT1 (-), PDS5B (-), FAT1 (-)
Pt#24	Male	76	CMML-1	Int-2	46, XY	-	TET2 (-),DNMT3A (-),SF3B1 (-),RBBP6 (-),NOTCH (-)
Pt#23	Male	62	CMML-1	High	47, XY, +8	Normal	ASXL1 (41.09), EZH2 (28.82), ETV6 (8.87), SETBP1 (39.2), NRAS (4.36), PTPN11 (2.69)
Pt#21	Male	54	CMML-0	Low	46, XY	-	SRSF2H2:H22 (46.12), IGH2 (38.91)
Pt#20	Female	70	CMML-1	Int-1	aneuploidy	Normal	SRSF2 (40.37), TET2 (31.51)
Pt#2	Male	62	CMML-2	High	Complex	Normal	ASXL1 (36.74), ETV6 (47.86), U2AF (45.33), TTN (46.9), KMT2D (51.05), ARID1A (47.59), KMT2D (54.3)
Pt#19	Male	59	CMML-1	Low	46, XY	-	SRSF2 (35.99), ASXL1 (29.32), IDH1 (1.14), IDH2 (35.50), RUNX1 (36.94), KIT (37.37)
Pt#17	Male	66	CMML-1	Int-2	46, XY	-	SRSF2 (49.25), TET2 (43.66), ABL2 (43.07), JAK2 (46.33), KIT (49.10), TTN (47.73), TYK2 (49.14)
Pt#16	Female	68	CMML-2	High	47, XX, +8	Normal	SRSF2 (44.36), TET2 (45.46), DNMT3A (46.87), NRAS (43.80), WT1 (44.58), CUX1 (4.51), BCOR (44.93), TET2 (45.21)
Pt#15	Female	64	CMML-1	Int-2	aneuploidy	Normal	TET2 (49.27), ASXL1 (30.60), ETV6 (70.22), EZH2 (97.64), RUNX1 (3.11), KRAS (44.83)
Pt#14	Male	38	CMML-1	Int-1	Complex	Normal	TET2 (99.22), MPL (49.03)
Pt#12	Male	62	CMML-2	Int-2	46, XY, +8	Normal	ASXL1 (-), CBL (-), JAK2 (-), EZH2 (-), GATA2 (-), TP53 (-)
Pt#11	Male	63	CMML-2	Int-2	46, XY	-	TET2 (41.62), ZRSR2 (91.3), ASXL1 (27.33), ATM (25.71), PML (37.20)
HD9	Male	49	BM donor	-	-	-	-
HD8	Male	63	BM donor	-	-	-	-
HD7	Male	65	Megaloblastic anemia	-	-	-	-
HD6	Male	71	Megaloblastic anemia	-	-	-	-
HD5	Male	56	BM donor	-	-	-	-
HD4	Female	41	BM donor	-	-	-	-
HD3	Male	58	BM donor	-	-	-	-
HD2	Male	59	BM donor	-	-	-	-
HD12	Female	45	BM donor	-	-	-	-
HD11	Female	39	BM donor	-	-	-	-
HD10	Male	48	BM donor	-	-	-	-
HD1	Male	55	BM donor	-	-	-	-
